# Supplementary material for: Arabidopsis RPT2a, 19S Proteasome Subunit, Regulates Gene Silencing via DNA Methylation
Source: PubMed Central journal article supplement (PMC3353898; doi:10.1371/journal.pone.0037086), 2012-05-16
Supplement: pone.0037086.s010.pdf [file pone.0037086.s010.pdf]

Table S1 primer list

| purpose                  | primer name              | sequences                        |                       |
|--------------------------|--------------------------|----------------------------------|-----------------------|
| For Real time PCR        | <i>LUC of 35S F</i>      | CCACGCTGGGCTACTTGATC             |                       |
|                          | <i>LUC of 35S R</i>      | TCCTCCTCGAAGCGGTACAT             |                       |
|                          | <i>LUC of RD29A F</i>    | GCGACCAACGCCTTGATT               |                       |
|                          | <i>LUC of RD29A R</i>    | TCCCAGTAAGCTATGTCTCCAGAA         |                       |
|                          | <i>RD29A F</i>           | TGATCGATGCACCAGGCGTAAC           |                       |
|                          | <i>RD29A R</i>           | CCCTGGTGGGAATAATTCCTCCG          |                       |
|                          | <i>18S rRNA F</i>        | CGGCTACCACATCCAAGGAA             |                       |
|                          | <i>18S rRNA R</i>        | GCTGGAATTACCGCGGCT               |                       |
| For Bisulfite sequencing | <i>pRD29A nested</i>     | GTAATGTAAAATGATTATATGATGGG       |                       |
|                          | <i>pRD29A converted</i>  | GGATCGATTATTAATAATAGTAAGTTAT     |                       |
|                          | <i>pRD29A exo R1</i>     | ATTCTATAATTTATATTCAACCCATATC     |                       |
|                          | <i>pRD29A exo R2</i>     | AAACTCAACATAAATAATATCCACC        |                       |
|                          | <i>pRD29A endo R1</i>    | CTAAAATTTAAAATCTACCTAAATACTAC    |                       |
|                          | <i>pRD29A endo R2</i>    | ATAATAATTCCTCTATTTAATCCATTTTCC   |                       |
|                          | <i>AtGP1 F1</i>          | TATAGTGTATAGTTGAGTAGAGTG         |                       |
|                          | <i>AtGP1 F2</i>          | TTGTAGTTTGAGTTGTGGAGTTTG         |                       |
|                          | <i>AtGP1 R</i>           | CAAAAAATACTCAATACCAATCCTCTA      |                       |
|                          | <i>AtMEA-ISR F</i>       | AAAGTGGTTGAGTTTATGAAAGGTTTTAT    |                       |
|                          | <i>AtMEA-ISR R</i>       | CTTAAAAAATTTCAACTCATTTTTTTAAAAAA |                       |
| For Mcr-PCR              | <i>AtSIN F</i>           | ACTTAATTAGCACTCAAATTAACAAAATA    |                       |
|                          | <i>AtSIN R</i>           | TTTAAACATAAGAAGAAGTTCCTTTTTTCAT  |                       |
|                          | <i>AtGP1 F</i>           | ACAGTGCCACAGTTGAGCAG             |                       |
|                          | <i>AtGP1 R</i>           | CAGAAAAATACTCGGTGCCAAT           |                       |
|                          | <i>AtMu1 F</i>           | GTGGATATACCAAAAACACAA            |                       |
|                          | <i>AtMu1 R</i>           | CTTAGCCTTCTTTTCAATCTCA           |                       |
|                          | <i>AtMEA-ISR F</i>       | TCCAACATGTTTTTCACATCTTC          |                       |
|                          | <i>AtMEA-ISR R</i>       | GGTTATGAATGAAGTATAGTTAG          |                       |
|                          | <i>AtCOPIA4 F</i>        | CTCACTCAAGCTTCGGTTCC             |                       |
|                          | <i>AtCOPIA4 R</i>        | TGTTGGTGAAGGACCGTACA             |                       |
|                          | <i>ACTIN2 F</i>          | AAACCTCAAAGACCAGCTCTT            |                       |
|                          | <i>ACTIN2 R</i>          | AACGATTCCTGGACCTGCC              |                       |
|                          | For expression analysis  | <i>COR15A F</i>                  | AGCGGAGCCAAGCAGAGCAG  |
|                          |                          | <i>COR15A R</i>                  | TGCGGCTTCTTTTCTTTCTCC |
|                          |                          | <i>DREB1b F</i>                  | CGGCGGGCCGTAAGAAGTTT  |
| <i>DREB1b R</i>          |                          | GACGGCGGCGGTAAAAGCAT             |                       |
| <i>MET1 5'</i>           |                          | ATCTGCAAGGCTATGAATGAGC           |                       |
| <i>MET1 3'</i>           |                          | CTTCTTGAGATGTAGGGCTTCT           |                       |
| <i>CMT3 5'</i>           |                          | AGGGACTTTCCTGGTGTATTG            |                       |
| <i>CMT3 3'</i>           |                          | TGCAAGCTCGGAAGGAAGAGTTGGC        |                       |
| <i>DRM2 5'</i>           |                          | GAAGTGGCACTTCATCGTCTC            |                       |
| <i>DRM2 3'</i>           |                          | AGATCCTCTCATCCTCGCACGT           |                       |
| <i>ABI3 5'</i>           |                          | GTGGCAAGTGTGATCATGG              |                       |
| <i>ABI3 3'</i>           |                          | CGTGAAAACCGTCCAAATCT             |                       |
| <i>At3g29650 5' TE</i>   |                          | AAAGGAATGATTCGCCTGGC             |                       |
| <i>At3g29650 3' TE</i>   |                          | TCAAACCTCTGGCTTCACAGGTC          |                       |
| For Southern blot        |                          | <i>LUC2 5'</i>                   | ATGGAAGATGCCAAAAACAT  |
|                          | <i>LUC2 3'</i>           | GAAGTCGTA CTGTTGAAGC             |                       |
|                          | <i>LUC 5'</i>            | ATGGAAGACGCCAAAAACATAAAG         |                       |
|                          | <i>LUC 3'</i>            | CCTTTTTGAAAACGAACACCAC           |                       |
| TAIL PCR                 | LB-3 for pGWB            | CGTCCGCAATGGTTATTAAGT            |                       |
|                          | LB-2 for pGWB            | TTGCCGCCGATCTTCATAGGG            |                       |
|                          | LB-1 for pGWB            | CCACCTCACCTTGGGTTTCTT            |                       |
|                          | LB-3 for pGWB            | ATGGTTCACGTAGTGGGCCATCG          |                       |
|                          | LB-2 for pGWB            | AGTGGACTCTGTTCCAAACTGG           |                       |
|                          | LB-1 for pGWB            | CAAACCAGCGTGGACCGCTTGCTGCAAC     |                       |
| For insertion check      | <i>LP for 35S::LUC2</i>  | ATGAGTGAAGAAGACGGCGGCT           |                       |
|                          | <i>RP for 35S::LUC2</i>  | TCTAACCTCTGCTTCTTCTTCG           |                       |
|                          | <i>LB for 35S::LUC2</i>  | CGTCCGCAATGGTTATTAAGT            |                       |
|                          | <i>LP for RD29A::LUC</i> | ATGTTCGAATAACCATAGATGAT          |                       |
|                          | <i>RP for RD29A::LUC</i> | TGAAAATATCCACAGTTCCCAT           |                       |
|                          | <i>LB for RD29A::LUC</i> | GCGTGGACCGCTTGCTGCAACT           |                       |
